# Supplementary material
Source: PubMed Central journal article supplement (PMC9036622)
Supplement: NIHMS1794097-supplement-1.pdf [file NIHMS1794097-supplement-1.pdf]

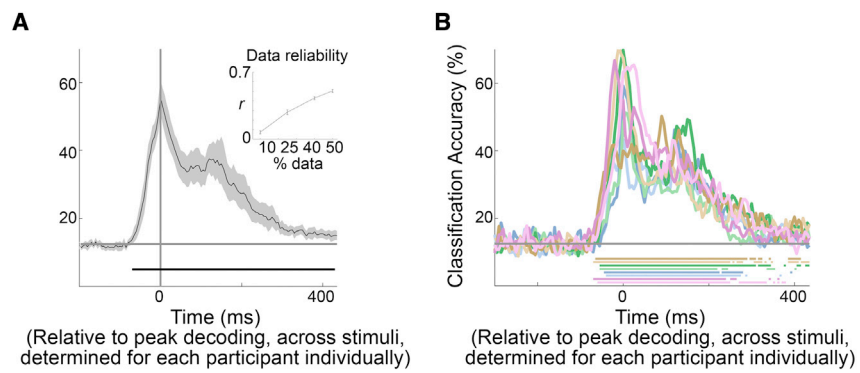

**Figure S1. Classification accuracy curves, computed relative to the time-to-peak decoding (corrected)**
